# Supplementary material
Source: HighWire-hosted journal article supplement (https://bmjopen.bmj.com/content/9/8/e028352)
Supplement: inline-supplementary-material-1 [file inline-supplementary-material-1.pdf]

**Appendix 1****Database:**

Medline (PUBMED)

**Search period:**

01.01.1980 to 03.04.2019

**Search strategy (keywords):**

(((((treatment) OR management) OR prevention) AND molar incisor  
hypomineralisation) OR molar incisor hypomineralization) OR mih
